1  
2  
3  
4  
5  
6  
7  
8  
9  
10  
11  
12  
13  
14  
15  
16  
17  
18  
19  
20

# The genetic landscape of animal behavior

Ryan A York\*<sup>1</sup>

## Affiliation:

<sup>1</sup>Department of Biology, Stanford University, Stanford CA, 94305, USA

\*Correspondence to: [ryanyork@stanford.edu](mailto:ryanyork@stanford.edu)

21 **Although most animal behaviors are associated with some form of heritable genetic variation we do**  
22 **not yet understand how genes sculpt behavior across evolution, either directly or indirectly. To**  
23 **address this, I here compile a dataset comprised of over 1,000 genomic loci representing a spectrum**  
24 **of behavioral variation across animal taxa. Comparative analyses reveal that courtship and feeding**  
25 **behaviors are associated with genomic regions of significantly greater effect than other traits, on**  
26 **average three fold greater than other behaviors. Investigations of whole-genome sequencing and**  
27 **phenotypic data for 87 behavioral traits from the Drosophila Genetics Reference Panel indicate**  
28 **that courtship and feeding behaviors have significantly greater genetic contributions and that, in**  
29 **general, behavioral traits overlap little in individual base pairs but increasingly interact at the**  
30 **levels of genes and traits. These results provide evidence that different types of behavior are**  
31 **associated with variable genetic bases and suggest that, across animal evolution, the genetic**  
32 **landscape of behavior is more rugged, yet predictable, than previously thought.**

33

34

35

36

37

38

39

40

41

42

43

44

45

46

47 **Introduction**

48        Nearly all behaviors are associated with some form of heritable genetic variation (Kendler and  
49 Greenspan 2006). This interplay between genetic and other forces that shape behavior is complex and  
50 disentangling it occupies an array of research endeavors, spanning disciplines from evolutionary biology  
51 to psychiatry. Accordingly, recent years have seen reasonable progress toward understanding the genetic  
52 architecture of certain behavioral traits using model systems (Reaume and Sokolowski 2011). The general  
53 conclusion from this research in mice, flies, worms, and humans is that the genetic architectures of  
54 behaviors generally fit an exponential distribution, with a small number of loci of moderate to large effect  
55 and a larger number of loci with small effects (Robertson 1967; Flint and Mackay 2009). However, owing  
56 to limits in data and methods, the extent to which genetic architectures vary across a full spectrum of  
57 behaviors and animal taxa has remained largely unexplored.

58        Behaviors can exhibit considerable variation in genetic influence. Comparative analyses reveal  
59 that behaviors vary substantially in heritability estimates, most often ranging between 10% and 50%  
60 (Kendler and Greenspan 2006; Mousseau and Roff 1987; Meffert et al. 2002). Analyses of individual  
61 behaviors reveal even greater diversity. For example, a single retro-element is responsible variation in a  
62 courtship song between *Drosophila* species (Ding et al. 2016) while other traits, such as deer mouse  
63 burrowing, have modular genetic architectures comprised of multiple interacting loci (Weber et al. 2013).  
64 Furthermore, the structure and effect of genetic architectures may vary with behavioral traits, as suggested  
65 by the preponderance of large effect loci found for insect courtship traits across multiple species  
66 (Arbuthnott 2009). Despite these observations the extent to which behavioral traits may systematically  
67 vary across species and behaviors remains unknown. Understanding this could provide insights into how  
68 behaviors respond to evolutionary processes, the prospects for finding general principles in the genetic  
69 evolution of behavior, and even potentially why there has been such variable success in the mapping of  
70 human neuropsychiatric traits.

71        Here, using reports associating behavioral variation with the genes for specific traits across  
72 diverse species, I assemble a comparative behavior genetics resource composed of 1,007 significant

73 genomic loci from 114 QTL studies conducted in 30 species across 5 taxonomic classes. These data  
74 exploit advances in sequencing and genetic marker design that have accelerated reports using quantitative  
75 trait locus (QTL) mapping to identify genomic regions that are associated with behavioral variation  
76 (Lander and Botstein 1989; Flint and Mackay 2009). With the compiled dataset I compare the genetic  
77 architecture of behavioral types across animal taxa. I then corroborate these observations and assay  
78 genetic processes involved in the early stages of behavioral differentiation in a natural population using  
79 whole genome data from the Drosophila Genetic Resource Panel (DGRP). These analyses provide insight  
80 into the genetic architecture of behavior across animals and the interplay between specific behavioral  
81 traits and their genetic influence through evolutionary history.

## 82 **Results and Discussion**

83 I performed a comprehensive analysis of results aggregated from 114 QTL studies conducted in  
84 30 species across 5 taxonomic classes to assemble a comparative behavior genetics resource composed of  
85 1,007 significant genomic loci (Database S1). The species examined represent over 500 million years of  
86 evolutionary divergence and over a broad spectrum of phylogenetic data (Fig 1a). For each locus I  
87 annotated the trait measured and its associated effect size (percent phenotypic variation explained), the  
88 reported measure of significance (e.g., LOD score), genomic locus, and study sample size. I focused the  
89 analyses on the reported effect sizes to allow comparison of the genomic architecture of traits across  
90 studies similar to previous meta-analyses of behavioral QTL in mice and flies (Flint 2003; Flint and  
91 Mackay 2009).

92 I found that the distribution of effect sizes in the dataset is similar to that found in these previous  
93 studies (Fig 1b). In the majority of loci (89.51%) the effect sizes are less than 20% with a mean effect size  
94 of 9.54%, suggesting that the genetic bases of most behaviors assayed are complex and composed of  
95 many loci of moderate effect.

96 Though these results support a model of many loci with small effects for behavior overall, I then  
97 asked whether genetic architecture might vary across *types* of behavior. I identified ten behavioral  
98 categories for which traits had been measured in at least two species (See supplementary methods). My

99 null hypothesis was that individual categories would likely reflect the overall distribution seen across the  
100 dataset, consistent with previous observations that QTL have relatively similar effect sizes across mouse  
101 and fly phenotypes (Flint 2003; Flint and Mackay 2009). Surprisingly, I found instead that behaviors  
102 differed significantly in their effect sizes. Specifically, loci associated with courtship (n=124) explained  
103 significantly more phenotypic variance than all other behaviors combined (Kruskal-Wallis  $p = 6.7 \times 10^{-29}$ )  
104 and had a mean effect size three times larger than found in all other categories (Fig. 1c). Loci associated  
105 with feeding behaviors (n=11) also explained significantly more phenotypic variance than all other  
106 behaviors combined ( $p = 6.8 \times 10^{-13}$ ) while emotion and social behaviors explained significantly less ( $p =$   
107  $8.6 \times 10^{-33}$ ;  $p = 2.5 \times 10^{-21}$ , respectively). These data suggest that, across species, courtship and feeding  
108 behaviors possess genetic architectures different from those of other traits.

109 **Figure 1:**

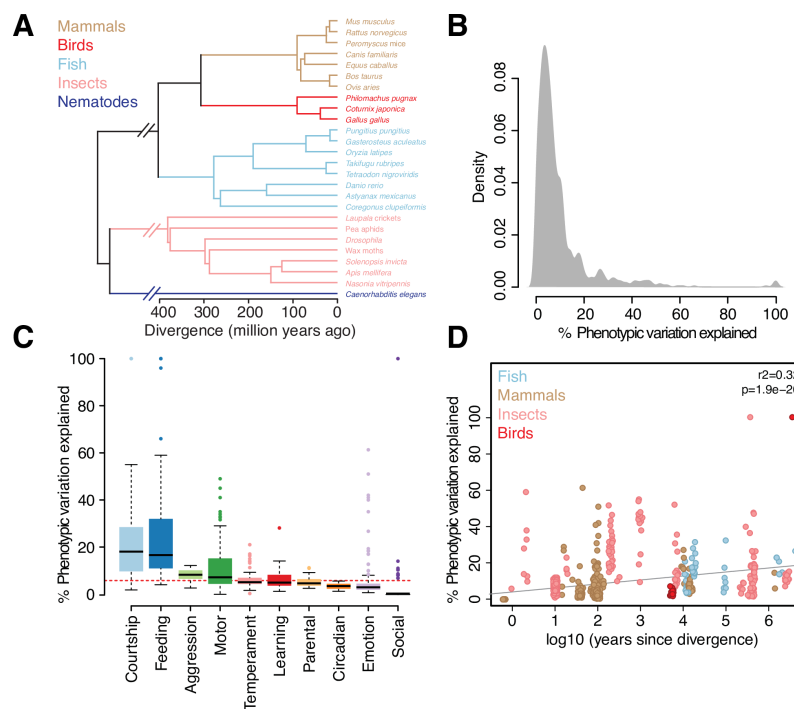

110  
111 To assess whether these observations arose from differences in the behavioral traits, as  
112 byproducts or experimental artifacts I controlled for factors that might have contributed bias. I first  
113 considered the effect of *intraspecific* (within species) compared to *interspecific* (between species) crosses  
114 used for the QTL mapping, a known source of influence in QTL studies (Broman 2001). I indeed found

115 that experiments employing interspecific crosses identified loci of significantly higher effect ( $p = 4.5 \times$   
116  $10^{-5}$ ). To control for this quantitatively, I estimated phylogenetic divergence and generation times between  
117 the crosses used in each of the 115 studies (Supplementary methods). There was a positive correlation  
118 between evolutionary divergence and effect size ( $r^2 = 0.32$ ,  $p = 1.9 \times 10^{-20}$ ; Fig. 1d; Supplementary  
119 methods). I also considered sample size, a well-known source of bias for which, as might be expected,  
120 there was a negative correlation with effect size ( $r^2 = -0.37$ ,  $p < 0.0001$ ).

121 To test the effect of key variables, evolutionary divergence individually, sample size individually,  
122 and both combined, I used three linear models (Supplementary methods). Strikingly, the overall structure  
123 of the effect size distribution remained largely unaffected after analysis of the residuals from all three  
124 models (Fig S1-3; Supplementary methods). In addition, courtship and feeding behaviors had  
125 significantly larger effect sizes even after accounting for these potential sources of bias ( $p = 1.4 \times 10^{-14}$   
126 and  $p = 5.7 \times 10^{-7}$ , respectively; Fig 2a).

127 **Figure 2:**

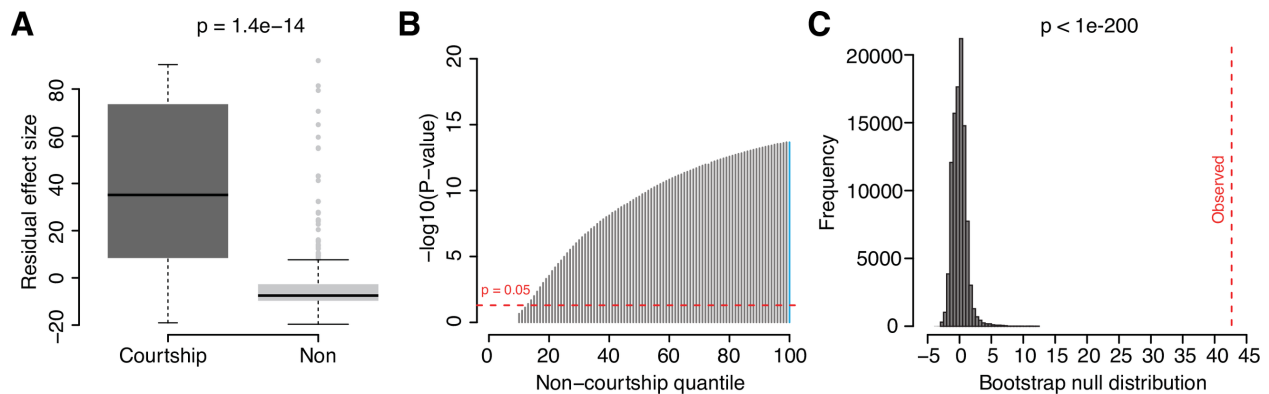

128  
129 After eliminating sources of potential biases inherent to individual datasets, I next considered the  
130 possibility that the detection of courtship and feeding behaviors as outliers was a trivial outcome of our  
131 own classification method for grouping single behaviors into ten categories. Minimally assuming that the  
132 categorizations of courtship and feeding traits were correct, it is possible that the binning of traits into the  
133 other eight categories may have masked a real signal from some biologically relevant categorization.

134 To test this possibility, I compared the distribution of effect sizes for the courtship and feeding  
135 categories to the distribution for *all* other behaviors combined (Supplementary methods). I found that  
136 courtship behaviors explained significantly more variation ( $p < 0.05$ ) than 89% of non-courtship behaviors  
137 while feeding behaviors explained more variation than 46% of non-feeding behaviors (Fig 2b; Fig S4b). I  
138 complemented this test with a bootstrap analysis that created a null distribution from 10,000 permutations  
139 of the non-courtship/feeding trait effect sizes. The observed mean adjusted effect size for both courtship  
140 and feeding fell significantly outside the bootstrap null distribution created for each comparison ( $p < 5 \times$   
141  $10^{-200}$ ) (Fig 2c; Fig S4c). These findings reject the notion that there may be another categorization of non-  
142 courtship and feeding behaviors missed by our schema that explains substantially more variation of effect.

143 My results suggest that courtship behaviors, and to a lesser extent feeding, may respond to  
144 evolutionary pressures differently than other behavioral traits. Consistent with this notion, previous  
145 analyses of the QTL behavior literature in insects found that a majority of courtship traits are associated  
146 with few loci of particularly strong effect that play a potential role in rapid speciation through prezygotic  
147 isolation (Arbuthnott 2009). In addition, theoretical work has suggested that traits controlling local  
148 adaptation during speciation, such as courtship and feeding, evolve more rapidly if they are associated  
149 with a smaller number of loci (Gavrilets et al. 2007). Given the importance of behavior's role in the early  
150 stages of speciation it may be possible that for the organisms and traits analyzed here, courtship and  
151 feeding traits with simpler genetic components of large effect were selected for during the evolution of  
152 these lineages. These observations led me to hypothesize that, in a naturally interbreeding population,  
153 courtship and feeding behaviors may be associated with more heritable genetic architectures of greater  
154 effect when compared to other behavioral traits.

155 To test this idea, I used the *Drosophila* Genetic Reference Panel (DGRP). The DGRP is  
156 comprised of over 200 inbred, fully sequenced *Drosophila melanogaster* lines isolated from a farmer's  
157 market in Raleigh, North Carolina (Mackay et al. 2012). Phenotypic measures for a wide number of  
158 behavioral traits are available for the DGRP lines in addition to full genome sequence and variant  
159 information, making this resource unique in enabling us to ask larger scale questions about variation and

160 evolution in behavior. I collected phenotypic measures for 87 behavioral traits spanning 8 categories,  
 161 produced in 9 separate GWA studies (Jordan et al. 2012; Weber et al. 2012; Swarup et al. 2013; Arya et  
 162 al. 2015; Gaertner et al. 2015; Garlapow et al. 2015; Morozova et al. 2015; Shorter et al. 2015).

163 I first used genome-wide complex trait analysis (GCTA) to survey the extent to which the 87  
 164 behavioral traits varied in genomic heritability attributable to all autosomal SNPs (Yang et al. 2011).  
 165 After running GCTA 20 behavioral traits passed a p-value threshold of 0.05, indicating that autosomal  
 166 SNPs could explain more trait variation than by chance in these cases (Fig. 3a; Supplementary methods).  
 167 The majority of these traits were enriched for involvement in courtship and feeding: 30% (6/20) were  
 168 associated with courtship and 50% (10/20) were either involved in olfactory behavior or feeding. Notably,  
 169 for a number of these traits the vast majority of phenotypic variation could be explained by genome-wide  
 170 SNPs, including preference for the food odorant ethyl acetate (99.99 +/-38.05%) and courtship transition  
 171 9 (89.38 +/- 50.03%).

172 **Figure 3:**

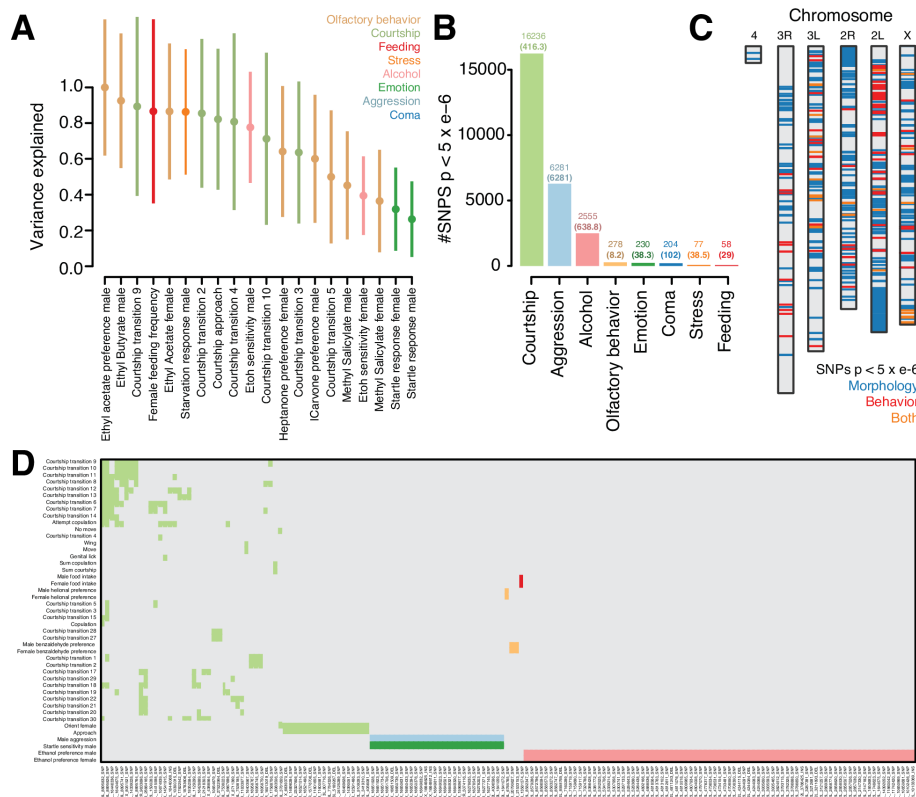

173



174 In addition to an increase in genomic heritability, my QTL analyses also showed that the genomic  
175 architectures of courtship and feeding traits may be simpler and of higher effect. To test this I performed  
176 a separate GWA experiment for each trait across all lines with available phenotypic data and filtered for  
177 SNPs with a nominal p-value of  $5 \times 10^{-6}$  (Supplementary methods). At this threshold I found 25,919 SNPs  
178 (Fig. 3b; Table S1).

179 I re-ran GCTA for each trait using only SNPs identified at  $p < 5 \times 10^{-6}$  from the GWAS  
180 (supplementary methods). This test is more conservative compared to genome-wide GCTA since it uses  
181 just the fraction of genomic variants significantly associated with each individual trait. After GCTA I  
182 found 16 behavioral traits that passed the p-value threshold of  $P < 0.05$ . Half of these significant traits  
183 were courtship behaviors, including the top four traits with the most variation explained by GWAS SNPs  
184 (Fig. S5a). The number of GWAS significant SNPs for these 16 traits varied substantially and was  
185 positively correlated with the amount of phenotypic variance explained (Fig. S5b). For traits with more  
186 SNPs, significant portions of the variance could be accounted for. For example, 665 SNPs could account  
187 for 63.52  $\pm$  8.42% of variation in courtship wing movement, 828 accounted for 68.64  $\pm$  6.69% of  
188 genital licking behavior, and 8,013 accounted for 78.45  $\pm$  5.97% of courtship approach behavior. The  
189 results from both GCTA tests in the DGRP lines support the hypothesis that courtship and feeding-related  
190 behaviors are associated with more heritable genetic architectures of large effect, even within less  
191 diverged natural populations.

192 I next used the DGRP lines to query the extent to which genes or genomic loci may affect  
193 multiple behavioral traits (pleiotropy) (Greenspan 2004). I exploited the breadth of phenotypic and  
194 genomic data available in the DGRP to empirically address this question at three levels: SNPs, genes, and  
195 traits. To allow for comparisons of behavior and other trait types I also conducted GWA for 26  
196 morphological traits reported in Vonesch et al. 2016 (Supplementary methods; Table S2). SNPs found to  
197 be associated with morphology and behavior at  $p < 5 \times 10^{-6}$  were distributed across the *Drosophila*  
198 *melanogaster* genome, 80 of which were associated with both behavioral and morphological traits (Fig.  
199 3c).

200 With this list of variants I queried which individual SNPs were associated with multiple  
201 behavioral categories. I identified 169 SNPs associated with at least two behavioral measures. These  
202 variants largely segregated *within* behavioral categories rather than *between* categories, suggesting that at  
203 the level of individual SNPs these traits may have largely independent genetic architectures amongst the  
204 DGRP lines (Fig. 3d). Many of these SNPs fell within the same genomic regions. I found 72 genes had at  
205 least 2 SNPs associated with multiple traits, several of which contained a multitude of variants (Fig. S6a).  
206 These genes are enriched for involved in biological processes such as Notch signaling, receptor activity,  
207 and morphogenesis (Supplementary methods; Table S3). In addition, I found 81 intergenic SNPs that  
208 each occurred within 20kb of their nearest gene - 26 genes in total - suggesting potential regulatory roles  
209 for these SNPs (Fig. S6b).

210 I then assessed the extent to which behaviorally associated variants may act pleiotropically at the  
211 trait level, using the list of 25,919 variants associated with behavior. With this I correlated the effect sizes  
212 of trait-associated SNPs with the effect sizes of those same variants across all other traits (following ref.  
213 26). The results of this analysis are summarized in the clustered heatmap in Fig. S7. In general I found  
214 extensive correlations between behavioral traits, suggesting widespread pleiotropic genetic effects. I also  
215 observed several large clusters of highly correlated traits, suggesting a higher-level structure for  
216 phenotypic variation based on trait interactions (labeled 1-4 in Fig. S7). The existence of these apparent  
217 clusters suggest that, while behavioral categories in the DGRP overlap little in genomic architecture at the  
218 individual variant level, there may be common molecular pathways through which different behavioral  
219 traits are altered in a correlated fashion.

220 Finally, I explored pairs of traits with putative directional relationships given the effect sizes of  
221 their associated variants. I avoid calling these relationships causal since, given the existence of extensive  
222 epistasis and genetic linkage the DGRP lines, it is difficult to identify individual variants of likely causal  
223 effect (Huang et al. 2012). I instead sought to elucidate aspects of a directional relationship by  
224 discriminating between cases in which a genotype effects multiple traits through different mechanisms  
225 versus scenarios where a genotype exerts an effect on a trait through a second, intermediate trait

226 (summarized as  $P_1 \leftarrow G \rightarrow P_2$  compared to  $G \rightarrow P_1 \rightarrow P_2$ ) (Pickrell et al. 2016). In addition to the 87  
 227 identified behavioral traits, I included the 26 morphological measures to gather insights into potentially  
 228 directional relationships between behavior and morphology in the DGRP.

229 I conducted pairwise tests of each trait at which GWAS variants at the  $p < 5 \times 10^{-6}$  level were  
 230 identified. Using a permutation based test I found 143 trait pairs that showed directionality wherein the  
 231 correlation of effect sizes was strong and significant in one comparison but not the other (Supplementary  
 232 methods; Fig. 4a).

233 Trait pairs identified as significant showed an uneven distribution of potential directional effect  
 234 between behavior and morphology, with the largest amount occurring between pairs of behavioral traits  
 235 (Fig. 4b). Figures 4c-f highlight examples of these SNP effect size correlations for different behavioral  
 236 and morphological measures. A particularly interesting connection was found between SNPs associated  
 237 with EGFR signaling affecting thorax length and the total amount of courtship attempted by male flies  
 238 ( $\rho = -0.86$ ,  $p = 8.6 \times 10^{-8}$ ; supplementary methods).

239 **Figure 4:**

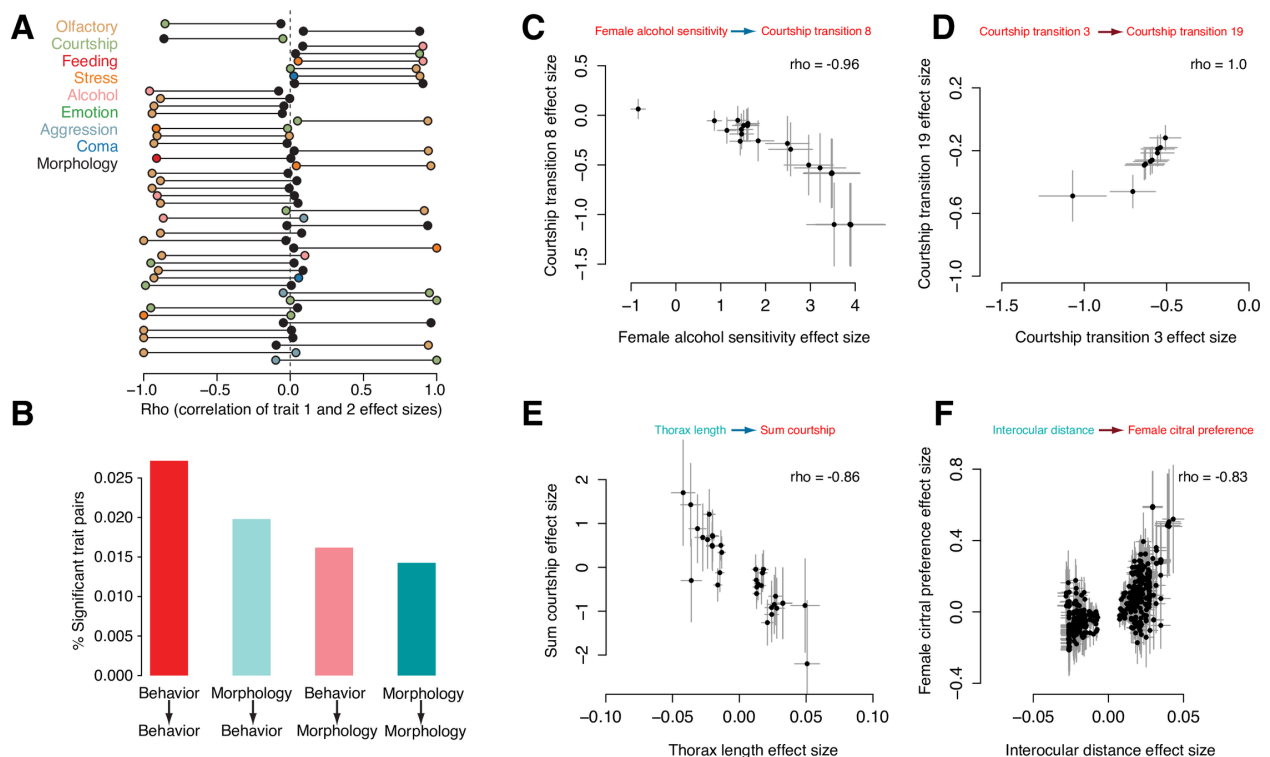

240

241 The connection between male courtship behaviors and body size has long been recognized in laboratory  
242 strains of *Drosophila* though with little evidence of a molecular basis for this effect (Ewing 1961). In  
243 general I find extensive evidence of both directional ( $G \rightarrow P_1 \rightarrow P_2$ ) and general ( $P_1 \leftarrow G \rightarrow P_2$ ) pleiotropic  
244 effects between traits in the DGRP, supporting the notion that the early stages of behavioral  
245 diversification involve the role of genes that can effect multiple types of traits. Furthermore, I observe that  
246 while variation in behavior across trait categories is associated with non-overlapping variants these may  
247 occur in common genes and molecular pathways with pleiotropic effects, reflecting suggestions of the  
248 existence of phenotypic “hotspots” that are recurrently used by evolution to sculpt phenotypes (Stern &  
249 Orgogozo 2008).

250 Taken together these results suggest that behavioral traits may respond to evolutionary processes  
251 with greater variation than previously appreciated. For example, researchers may now anticipate that  
252 assaying a courtship ritual will likely yield a higher genetic effect than, say, variation in a personality  
253 trait. These insights are supported by observations that behavioral categories vary in their heritability and  
254 genomic architecture during even the earliest stages of diversification within populations. Furthermore,  
255 such behaviors are associated with a small number of highly pleiotropic genes and these traits interact,  
256 indicating that there are identifiable molecular and phenotypic patterns that govern behavior.

257 These findings suggest several important caveats and prospects for future behavior genetic  
258 studies. First, QTL mapping methods possess inherent limitations in detecting the complete genetic  
259 architecture of certain traits. For example, QTL studies are often insensitive to the detection of loci with  
260 opposing effects on the trait of interest, thus potentially masking important genetic effects from the  
261 researcher’s analysis (Mackay et al. 2009). Future studies of the genetic architecture of behavior will thus  
262 benefit from integrating QTL methods with results from genome-wide sequencing and genetic  
263 interrogations directed by genome editing<sup>7</sup>. Second, a more complete survey of behavioral categories  
264 within and across a variety of taxa are needed to confidently establish whether or not the patterns  
265 observed in this study are general principles of how behavior evolves. Finally, empirical tests in the field

266 and lab may offer a deeper understanding of the extent to which courtship and feeding behaviors respond  
267 uniquely to selective pressures, and which evolutionary and ecological mechanisms may account for this  
268 phenomenon. Expanding on this with the tools and data now becoming available, behavioral biology may  
269 begin to produce a more nuanced and predictive understanding of the interplay of genetic forces  
270 governing the evolution of behavior.

271

272

273

274

275

276

277

278

279

280

281

282

283

284

285

286

287

288

289

290

291

## 292 **Materials and methods**

### 293 **QTL collection**

294 I first identified behavioral QTL through literature search querying online engines (e.g. PUBMED) with  
295 the keywords “QTL”, “behavior”, “quantitative trait locus”, and “behavioral”. I analyzed the results and  
296 collected QTL for each relevant publication identified. In order to gather as many relevant QTL as  
297 possible over time I expanded the search to include more specific terms relating to behaviors and  
298 categories of interest and to those referenced in previously identified papers. I filtered for loci reported as  
299 significant by the original authors, resulting in 1,007 QTL from 115 studies. For each locus I recorded the  
300 reported effect size (percent phenotypic variation explained), significance measure, genomic location,  
301 sample size, and the number of loci reported overall. QTL studies often report other measures in addition  
302 to those that I collected (e.g. broad or narrow sense heritability). While it would be desirable to compare  
303 certain of these across behaviors and taxonomic groups I found that, within the studies assayed, the  
304 reporting of measures other than those I collected was very inconsistent and allowed for only extremely  
305 restricted comparisons. Since the measure used to report significance varied across studies I converted all  
306 LOD scores to Log p-values using the following R function (R.C.team 2013):

307 
$$-\log(\text{pchisq}(x * (2 * \log(10)), df=1, \text{lower.tail}=\text{FALSE}) / 2)$$

308 I next classified behaviors following the six groups used in the meta-analysis of mouse QTL studies done  
309 by Flint 2003. Several categories represented in our data set were not assayed in this original study (e.g.  
310 courtship). In our classification of these I attempted to strike a balance between breadth (to increase the  
311 tractability of our comparisons) and biological specificity. To do so I required that a category be  
312 represented in at least two species or populations and that the classification match either that reported by  
313 the original authors or a reasonable division as reported by the animal behavior literature. The  
314 classification of a range of biological traits into broader categories is of course difficult and can  
315 repeatedly tempt debate; accordingly this is discussed at length in Flint 2003. I offer that it is important to  
316 rigorously test results implicating a broadly defined category as interesting through comparisons of that  
317 category to the overall distribution of effects, with the goal of controlling for bias introduced by the

318 original classifications (as is discussed below). All QTL and the associated measures mentioned here are  
319 available in Table S1.

### 320 **Phylogeny**

321 I used the phylogenetic relationships reported in Ponting 2008 as a template for our phylogeny of species  
322 examined (Fig. 1a). I added unrepresented species and adjusted dates of evolutionary divergence using the  
323 most recent reports available for each specific clade/species. The following sources were used (along with  
324 the associated phylogenetic divergences):

325  
326 *Ruff/quail and chicken*: Jarvis et al. 2014  
327 *Quail and chicken*: Kayang et al. 2006  
328 *Nine spined and three spined stickleback*: Guo et al. 2013  
329 *Stickleback and teleost*: Pfister et al. 2007  
330 *Cave fish and teleost divergence*: Briggs 2005  
331 *Laupala cricket and insect divergence*: Misof et al. 2014  
332 *Wax moth and insects*: Misof et al. 2014  
333 *Pea aphids and insects*: Misof et al. 2014  
334 *Peromyscus and mice/rats*: Bedford and Hoekstra 2015  
335 *Solenopsis and Apis*: Ward 2014  
336 *Sheep and cows*: Bibi 2013  
337 *White fish and teleosts*: Betancu-R et al. 2013

338

### 339 **Effect size comparisons**

340 The overall distribution of effect sizes (Fig. 1B) was plotted using the density function in R. Since some  
341 behavioral categories possessed relatively small sample sizes all comparisons of effect size were done  
342 with the non-parametric Kruskal-Wallis test.

343

344 For the analyses plotted in Fig. 2a-2c and Figs. S1-4 I summed the effect sizes of all loci associated with a  
345 specific behavioral measure for each study. This was done to allow for a comparison of the maximum  
346 amount of phenotypic variance explained for each trait in order to allow for conservative test between  
347 courtship and feeding and all other traits. For example, there may have been non-courtship/feeding traits  
348 associated with many loci that, on their own, possessed small effects but when added together explained a  
349 substantial portion of variation. Following this I filtered for loci where sample size information and

350 evolutionary divergence information were available, resulting in 773 loci. The rationales for each estimate  
351 of evolutionary divergence are discussed in the next section.

352

353 I used several linear models to test for potential biasing effects from evolutionary divergence and sample  
354 size, both individually and combined. The resulting residuals from these models are presented in figures  
355 S1-3. I found no significant correlations between the residuals from the models and the original variables  
356 tested. For the model incorporating sample size alone I observed a correlation between the residuals and  
357 sample size itself of  $-4.06 \times 10^{-17}$ . For the models incorporating evolutionary divergence alone I observed  
358 a correlation between the residuals and divergence of  $-5.34 \times 10^{-17}$ . Finally for the model incorporating  
359 both there was a correlation of  $-1.16 \times 10^{-16}$  with sample size and a correlation of  $3.00 \times 10^{-17}$  for  
360 divergence. Given the lack of correlation with either variable this suggests that the combined model  
361 successfully controlled for both factors. The residuals for this final combined model were then used for a  
362 comparison between all categories (Fig. S1) and between courtship/non-courtship (Fig. 2a) and  
363 feeding/non-feeding (Fig. S4a).

364

365 For the comparison of the observed courtship and feeding residual effect sizes to the quantiles of all non-  
366 courtship/feeding traits I used the following R function (where `non_courtship` and `courtship` are  
367 vectors of residual effect sizes for these groups):

```
368  
369 quants = data.frame(matrix(nrow=100, ncol=2));  
370 for (i in 10:nrow(quants)){  
371   court_quants[i,1] = i;  
372   non_court = non_courtship[non_courtship[,10]>  
373     quantile(non_courtship[,10], 1-i/100),];  
374   df = as.data.frame(rbind(courtship, non_court));  
375   court_quants[i,2] = kruskal.test(df[,10],  
376     as.factor(df[,11]))$p.value  
377 }  
378
```

379 The bootstrap comparisons in Figs. 2c and S3c were done using the custom R function

380 `bootstrap.2independent` which is available on the Fernald lab website. For these tests I



381 permuted the non-courtship/non-feeding residual effect sizes 10,000 times (with replacement) to create a  
382 null distribution against I which I tested the observed median residual effect size for each trait. A p-value  
383 for each test was calculated by dividing the sum of instances in which the permuted medians were greater  
384 than the observed by 10,000. All plots were produced using base graphics in R and adjusted for design in  
385 Adobe Illustrator.

### 386 **Data collection of the DGRP lines**

387 I downloaded the DGRP freeze 2.0 variant calls and plink files from the *Drosophila* genetics reference  
388 panel website (<http://dgrp2.gnets.ncsu.edu>). Raw data for phenotypic measures were downloaded from  
389 the following sources:

390 *Starvation resistance*: Mackay et al. 2012  
391 *Startle response*: Mackay et al. 2012  
392 *Chill coma recovery time*: Mackay et al. 2012  
393 *Startle response under oxidative stress*: Jordan et al. 2012  
394 *Negative geotaxis under oxidative stress*: Jordan et al. 2012  
395 *Olfactory behavior (benzaldehyde)*: Swarup et al. 2013  
396 *Courtship behavior*: Gaertner et al. 2015  
397 *Olfactory behavior (multiple measures)*: Arya et al. 2015  
398 *Aggressive behavior*: Shorter et al. 2015  
399 *Food intake*: Garlapow et al. 2015  
400 *Alcohol sensitivity*: Morozova et al. 2015  
401 *Morphology*: Vonesch et al. 2016

402  
403 I compiled the raw data into two tables for use in genome-wide analyses of SNP variation, one composed  
404 of the 87 behavioral traits obtained and another of the 26 morphological traits. For traits in which multiple  
405 measurements were reported I calculated the mean trait measurement and used this for subsequent  
406 analyses. I classified traits into behavioral categories in the same fashion as for the evolutionary QTL  
407 analyses.

### 408 **Heritability analyses**

409 I first employed genome-wide complex trait analysis (GCTA) to survey genomic heritability across the 87  
410 behavioral traits (Yang et al. 2011). For each trait I used `grem1 v1.26.0` to obtain estimates of  
411 heritability from genome-wide SNP variation across all DGRP lines for which phenotypic measures were

412 available. Using the plink files obtained from the DGRP website (base file name dgrp2) I first created a  
413 genotype relatedness matrix for all DGRP lines:

```
414 gcta64 --bfile dgrp2 --autosome --autosome-num 3 --maf 0.01 --  
415 make-grm --out dgrp2
```

416  
417 Individual phenotype files (\*.phen) were created for each trait, including fam and individual IDs and the  
418 associate phenotypic measures for each DGRP line. I ran GREML for each phenotype separately:

```
419 subjects=$(ls | grep ".phen")  
420 for s in $subjects  
421 do  
422 gcta64 --grm dgrp2 -pheno $s --reml --out "${s}"  
423 done
```

424 I then filtered for traits in which the reported p-value from GREML was <0.05, resulting in 20 traits. Fig  
425 3a. shows the distribution of phenotypic variance explained by genome-wide SNPs as measured by the  
426 genotypic variance divided by phenotypic variance ( $V_g/V_p$ ).

427

428 For the GCTA analyses of just GWAS significant SNPs I compiled a list of associated SNPs for each trait  
429 and built a separate genotype relatedness matrix for each by extracting just those SNPs from the plink bed  
430 files. I then reran GREML for each trait using the corresponding genotype relatedness matrix and testing  
431 only for the SNPs that it contained. Like above I then filtered for traits in which the reported p-value from  
432 GREML was <0.05, resulting in 16 traits.

### 433 **Genome-wide association analyses**

434 The plink and phenotype files from the GCTA analyses were used to conduct separate genome-wide  
435 association studies (GWAS) for each trait. I used plink v1.90 to conduct these tests on the combined  
436 phenotype matrix ("dgrp\_phenos.txt"):

```
437 plink --bfile dgrp2 --pheno dgrp_phenos.txt --assoc --out  
438 plink_GWAS/dgrp_all_traits --all-pheno
```

439

440 Associations were then filtered for a p-value <  $5 \times 10^{-6}$ . SNPs associated with multiple traits were  
441 identified and plotted using a binary heatmap with the heatmap2 function in R. Genes associated with  
442 multiple SNPs were identified using the variant annotation file available on the DGRP website.

443  
444 I next assayed relationships between SNPs and multiple traits using the effect sizes (betas) in the  
445 \*.qassoc files outputted by plink. To do so I compiled a matrix of the effect sizes for all traits at  
446 each of the 25,919 significant SNPs (Table S4). This matrix could then be directly queried for comparison  
447 of the effect sizes associated with a certain set of SNPs across traits of interest. In order to assess the  
448 overall structure of this data set I used Spearman rank correlations to test the associations between all  
449 possible trait pairs. The results of this test were visualized using the clustering functionality of  
450 heatmap2 in R (Fig. S7).

#### 451 **Tests for trait pair directionality**

452 Directionality in the relationships between trait pairs was tested by first obtaining pairwise rank  
453 correlations for each trait pair in which both traits were associated with >3 significant SNPs (60 traits).  
454 For traits x and y,  $s_1$  is the vector of SNPs significantly associated with trait x and  $s_2$  is the vector of SNPs  
455 significantly associated with trait y.  $xx$  is the vector of effect sizes at  $s_1$  for trait x and  $xy$  is the vector of  
456 effect sizes at  $s_1$  for trait y. Similarly  $yy$  is the vector of effect sizes at  $s_2$  for trait y and  $yx$  is the vector of  
457 effect sizes at  $s_2$  for trait x. Rank correlations can then be obtained for each in R:

```
458 x_cor = cor(xx, xy, method="spearman")  
459 y_cor = cor(yy, yx, method="spearman")
```

460 Since the strongest signal of directionality would be cases in which the absolute value of  $x\_cor/y\_cor$   
461 equals 1 and the other is equal 0, I assessed directionality as a function of how close to 1 the absolute  
462 difference between the correlations was:

```
463 D = abs(1-abs(x_cor-y_cor))
```

464 I filtered for trait pairs in which rho for one correlation was >0.5 and for the other was <0.1. I then tested  
465 the directional significance of each trait pair by permuting  $xx$ ,  $xy$ ,  $yy$ , and  $yx$  1,000 times and  
466 recomputed  $x\_cor$ ,  $y\_cor$ , and D for each permutation. I then calculated a p-value for each trait pair  
467 by comparing the vector of permuted D values (pseudo) to the observed D:

```
468 pseudo = c();
```

```
469   for (trial in 1:1000) {
470     pxx = sample(xx, length(xx), replace = F);
471     Bxy = sample(xy, length(xy), replace = F);
472     Byy = sample(yy, length(yy), replace = F);
473     Byx = sample(yx, length(yx), replace = F);
474     p_x_cor = cor(pxx, pxy, method="spearman",
475                 use="pairwise.complete.obs")
476     p_y_cor = cor(pyy, pyx, method="spearman",
477                 use="pairwise.complete.obs")
478     d = abs(p_x_cor-p_y_cor)
479     pD = abs(1-d)
480     pseudo[trial] = pD
481   }
482   p_value = sum(D > pD)/1000
483
```

484 The resulting p-values were adjusted using Bonferroni correction.

485

486

487

488

489

490

491

492

493

494

495

496

497

498 **Acknowledgments:** I thank Hunter Fraser, Russell Fernald, Christopher Martin, Graham Coop, David  
499 Kingsley, Austin Hilliard, Trudy Mackay, and David Stern for critical reading and useful discussions.

500

501

502

503

504

505

506

507

508

509

510

511

512

513

514

515

516

517

518

519 **Fig. 1. The genomic landscape of animal behavior** | (A) Phylogeny of all species studied in which  
520 genomic loci were collected for the meta-analysis. (B) Density plot of the distribution of effect sizes for  
521 all behavioral traits studied. (C) Boxplot of effect sizes (% variation explained) by behavioral category.  
522 (D) Scatterplot of the relationship between evolutionary divergence (represented by the log10 of years  
523 since divergence) and effect size.

524 **Fig. 2 Assaying the genetic architecture of courtship** | (A) Boxplot of the comparison between the  
525 residual effect sizes of courtship and non-courtship behaviors that resulted from a linear model controlling  
526 for sample size and evolutionary divergence. (B) Quantile-based  $-\log_{10}(\text{p-values})$  comparing the residual  
527 effect sizes of courtship and non-courtship behaviors at each quantile cutoff. The blue line corresponds to  
528 the comparison in Fig 2a. (C) The null distribution resulting from bootstrapping all non-courtship residual  
529 effect sizes for 10,000 permutations and the observed median residual effect size for courtship (dashed  
530 red line).

531 **Figure 3 Comparative genome-wide analyses of the Drosophila Genetic Resource Panel** | (A)  
532 Heritability estimates ( $V(G)/V_p$ ) from GCTA for the 20 measures identified as significant ( $p\text{-value} <$   
533  $0.05$ ), colored by behavioral category. (B) Barplot summarizing the number of SNPs with  $p < 5 \times 10^{-6}$   
534 collected for each behavioral category from GWAS on 87 traits. (C) The distribution of SNPs with  $p < 5$   
535  $\times 10^{-6}$  across the *Drosophila melanogaster* genome for morphological (blue) behavioral traits (red) and  
536 SNPs that associate with measures of both (orange) (D) Heatmap representing the distribution of shared  
537 SNPs with  $p < 5 \times 10^{-6}$  across all behavioral traits. Plotted are SNPs that possess associations with at least  
538 two behavioral traits, colored by the categories highlighted in (A).

539 **Figure 4 Directional relationships between trait pairs in the DGRP** | (A) Directional trait pairs  
540 identified as significant by permutation testing. Plotted are traits where the significant correlation  
541 possesses a  $\rho > 0.85$ . The significant correlation is represented by a red circle. (B) Barplot summarizing  
542 the number of significant trait pairs identified where the focal trait is either behavioral or morphological  
543 with a correlation one of these two domains. Behavioral focal traits are colored red, morphological traits

544 are colored blue. **(C-F)** Scatterplots of the effect sizes for the focal SNPs of example significant trait  
545 pairs. Standard errors are plotted as grey lines. Positive correlations are represented by red arrows and  
546 negative correlations are represented by blue arrows.

547

548

549

550

551

552

553

554

555

556

557

558

559

560

561

562

563

564

565

566

567

568

569

570 **References:**

- 571 1. Arbuthnott D. The genetic architecture of insect courtship behavior and premating isolation.  
572 Heredity (Edinb). 2009;103(1):15-22. doi: 10.1038/hdy.2009.22. PubMed PMID: 19259113.
- 573 2. Arya GH, Magwire MM, Huang W, Serrano-Negron YL, Mackay TF, Anholt RR. The genetic  
574 basis for variation in olfactory behavior in *Drosophila melanogaster*. Chem Senses. 2015;40(4):233-  
575 43. doi: 10.1093/chemse/bjv001. PubMed PMID: 25687947; PubMed Central PMCID:  
576 PMC4398050.
- 577 3. Bedford NL, Hoekstra HE. *Peromyscus* mice as a model for studying natural variation. Elife.  
578 2015;4. doi: 10.7554/eLife.06813. PubMed PMID: 26083802; PubMed Central PMCID:  
579 PMC4470249.
- 580 4. Betancur RR, Broughton RE, Wiley EO, Carpenter K, Lopez JA, Li C, et al. The tree of life and a  
581 new classification of bony fishes. PLoS Curr. 2013;5. doi:  
582 10.1371/currents.tol.53ba26640df0ccae75bb165c8c26288. PubMed PMID: 23653398; PubMed  
583 Central PMCID: PMC3644299.
- 584 5. Bibi F. A multi-calibrated mitochondrial phylogeny of extant Bovidae (Artiodactyla, Ruminantia)  
585 and the importance of the fossil record to systematics. BMC Evolutionary Biology. 2013;13:166. doi:  
586 10.1186/1471-2148-13-166. PubMed PMID: 23927069; PubMed Central PMCID: PMC3751017.
- 587 6. Briggs JC. The biogeography of otophysan fishes (Ostariophysi : Otophysi): a new appraisal. (vol  
588 32, pg 287, 2005). J Biogeogr. 2005;32(5):919-. doi: 10.1111/j.1365-2699.2005.01286.x. PubMed  
589 PMID: WOS:000228751400015.
- 590 7. Broman KW. Review of statistical methods for QTL mapping in experimental crosses. Lab Anim  
591 (NY). 2001;30(7):44-52. PubMed PMID: 11469113.
- 592 8. Ding Y, Berrocal A, Morita T, Longden KD, Stern DL. Natural courtship song variation caused by  
593 an intronic retroelement in an ion channel gene. Nature. 2016;536(7616):329-32. doi:  
594 10.1038/nature19093. PubMed PMID: 27509856.



- 595 9. Ewing AW. Body size and courtship behaviour in *Drosophila melanogaster*. *Animal Behaviour*.  
596 1961;9:93-9.
- 597 10. Flint J, Mackay TF. Genetic architecture of quantitative traits in mice, flies, and humans. *Genome*  
598 *Res.* 2009;19(5):723-33. doi: 10.1101/gr.086660.108. PubMed PMID: 19411597; PubMed Central  
599 PMCID: PMCPMC3647534.
- 600 11. Flint J. Analysis of quantitative trait loci that influence animal behavior. *J Neurobiol.*  
601 2003;54(1):46-77. doi: 10.1002/neu.10161. PubMed PMID: 12486698.
- 602 12. Gaertner BE, Ruedi EA, McCoy LJ, Moore JM, Wolfner MF, Mackay TF. Heritable variation in  
603 courtship patterns in *Drosophila melanogaster*. *G3 (Bethesda)*. 2015;5(4):531-9. doi:  
604 10.1534/g3.114.014811. PubMed PMID: 25650358; PubMed Central PMCID: PMCPMC4390569.
- 605 13. Garlapow ME, Huang W, Yarboro MT, Peterson KR, Mackay TF. Quantitative Genetics of Food  
606 Intake in *Drosophila melanogaster*. *Plos One*. 2015;10(9):e0138129. doi:  
607 10.1371/journal.pone.0138129. PubMed PMID: 26375667; PubMed Central PMCID:  
608 PMCPMC4574202.
- 609 14. Gavrillets S, Vose A, Barluenga M, Salzburger W, Meyer A. Case studies and mathematical  
610 models of ecological speciation. 1. Cichlids in a crater lake. *Mol Ecol.* 2007;16(14):2893-909. doi:  
611 10.1111/j.1365-294X.2007.03305.x. PubMed PMID: 17614905.
- 612 15. Greenspan RJ. E pluribus unum, ex uno plura: quantitative and single-gene perspectives on the  
613 study of behavior. *Annu Rev Neurosci.* 2004;27:79-105. doi:  
614 10.1146/annurev.neuro.27.070203.144323. PubMed PMID: 15217327.
- 615 16. Guo B, Chain FJ, Bornberg-Bauer E, Leder EH, Merila J. Genomic divergence between nine- and  
616 three-spined sticklebacks. *BMC Genomics.* 2013;14:756. doi: 10.1186/1471-2164-14-756. PubMed  
617 PMID: 24188282; PubMed Central PMCID: PMCPMC4046692.
- 618 17. Huang W, Richards S, Carbone MA, Zhu D, Anholt RR, Ayroles JF, et al. Epistasis dominates the  
619 genetic architecture of *Drosophila* quantitative traits. *Proc Natl Acad Sci U S A.* 2012;109(39):15553-

- 620 9. doi: 10.1073/pnas.1213423109. PubMed PMID: 22949659; PubMed Central PMCID:  
621 PMCPMC3465439.
- 622 18. Jarvis ED, Mirarab S, Aberer AJ, Li B, Houde P, Li C, et al. Whole-genome analyses resolve  
623 early branches in the tree of life of modern birds. *Science*. 2014;346(6215):1320-31. doi:  
624 10.1126/science.1253451. PubMed PMID: 25504713; PubMed Central PMCID: PMCPMC4405904.
- 625 19. Jordan KW, Craver KL, Magwire MM, Cubilla CE, Mackay TF, Anholt RR. Genome-wide  
626 association for sensitivity to chronic oxidative stress in *Drosophila melanogaster*. *Plos One*.  
627 2012;7(6):e38722. doi: 10.1371/journal.pone.0038722. PubMed PMID: 22715409; PubMed Central  
628 PMCID: PMCPMC3371005.
- 629 20. Kayang BB, Fillon V, Inoue-Murayama M, Miwa M, Leroux S, Feve K, et al. Integrated maps in  
630 quail (*Coturnix japonica*) confirm the high degree of synteny conservation with chicken (*Gallus*  
631 *gallus*) despite 35 million years of divergence. *BMC Genomics*. 2006;7:101. doi: 10.1186/1471-2164-  
632 7-101. PubMed PMID: 16669996; PubMed Central PMCID: PMCPMC1534036.
- 633 21. Kendler KS, Greenspan RJ. The nature of genetic influences on behavior: lessons from "simpler"  
634 organisms. *Am J Psychiatry*. 2006;163(10):1683-94. doi: 10.1176/ajp.2006.163.10.1683. PubMed  
635 PMID: 17012675.
- 636 22. Lander ES, Botstein D. Mapping mendelian factors underlying quantitative traits using RFLP  
637 linkage maps. *Genetics*. 1989;121(1):185-99. PubMed PMID: 2563713; PubMed Central PMCID:  
638 PMCPMC1203601.
- 639 23. Mackay TF, Richards S, Stone EA, Barbadilla A, Ayroles JF, Zhu D, et al. The *Drosophila*  
640 *melanogaster* Genetic Reference Panel. *Nature*. 2012;482(7384):173-8. doi: 10.1038/nature10811.  
641 PubMed PMID: 22318601; PubMed Central PMCID: PMCPMC3683990.
- 642 24. Mackay TF, Stone EA, Ayroles JF. The genetics of quantitative traits: challenges and prospects.  
643 *Nat Rev Genet*. 2009;10(8):565-77. doi: 10.1038/nrg2612. PubMed PMID: 19584810.
- 644 25. Meffert LM, Hicks SK, Regan JL. Nonadditive genetic effects in animal behavior. *Am Nat*.  
645 2002;160 Suppl 6:S198-213. doi: 10.1086/342896. PubMed PMID: 18707477.

- 646 26. Misof B, Liu S, Meusemann K, Peters RS, Donath A, Mayer C, et al. Phylogenomics resolves the  
647 timing and pattern of insect evolution. *Science*. 2014;346(6210):763-7. doi:  
648 10.1126/science.1257570. PubMed PMID: 25378627.
- 649 27. Morozova TV, Huang W, Pray VA, Whitham T, Anholt RR, Mackay TF. Polymorphisms in early  
650 neurodevelopmental genes affect natural variation in alcohol sensitivity in adult drosophila. *BMC*  
651 *Genomics*. 2015;16:865. doi: 10.1186/s12864-015-2064-5. PubMed PMID: 26503115; PubMed  
652 Central PMCID: PMCPMC4624176.
- 653 28. Mousseau TA, Roff DA. Natural selection and the heritability of fitness components. *Heredity*  
654 (Edinb). 1987;59 ( Pt 2):181-97. PubMed PMID: 3316130.
- 655 29. Pfister P, Randall J, Montoya-Burgos JI, Rodriguex I. Divergent evolution among teleost V1r  
656 receptor genes. *PLoS One*. 2007. doi: 10.1371/journal.pone.0000379. PubMed PMID: 17440615;  
657 PubMed Central PMCID: PMC1849887.
- 658 30. Pickrell JK, Berisa T, Liu JZ, Segurel L, Tung JY, Hinds DA. Detection and interpretation of  
659 shared genetic influences on 42 human traits. *Nat Genet*. 2016;48(7):709-17. doi: 10.1038/ng.3570.  
660 PubMed PMID: 27182965.
- 661 31. Ponting CP. The functional repertoires of metazoan genomes. *Nat Rev Genet*. 2008;9(9):689-98.  
662 doi: 10.1038/nrg2413. PubMed PMID: 18663365.
- 663 32. Reaume CJ, Sokolowski MB. Conservation of gene function in behaviour. *Philos T R Soc B*.  
664 2011;366(1574):2100-10. doi: 10.1098/rstb.2011.0028. PubMed PMID: WOS:000291784000005.
- 665 33. Robertson A. The nature of quantitative genetic variation. In: Brink R.A., Styles E.D.,  
666 editors. *Heritage from Mendel*. University of Wisconsin; Madison, WI: 1967. pp. 265–280
- 667 34. Shorter J, Couch C, Huang W, Carbone MA, Peiffer J, Anholt RR, et al. Genetic architecture of  
668 natural variation in *Drosophila melanogaster* aggressive behavior. *Proc Natl Acad Sci U S A*.  
669 2015;112(27):E3555-63. doi: 10.1073/pnas.1510104112. PubMed PMID: 26100892; PubMed Central  
670 PMCID: PMCPMC4500262.

- 671 35. Stern DL, Orgogozo V. The loci of evolution: how predictable is genetic evolution? *Evolution*.  
672 2008;62(9):2155-77. doi: 10.1111/j.1558-5646.2008.00450.x. PubMed PMID: 18616572; PubMed  
673 Central PMCID: PMCPMC2613234.
- 674 36. Swarup S, Huang W, Mackay TF, Anholt RR. Analysis of natural variation reveals neurogenetic  
675 networks for *Drosophila* olfactory behavior. *Proc Natl Acad Sci U S A*. 2013;110(3):1017-22. doi:  
676 10.1073/pnas.1220168110. PubMed PMID: 23277560; PubMed Central PMCID: PMCPMC3549129.
- 677 37. Team RC. R: A language and environment for statistical computing. Vienna, Austria: R  
678 Foundation for Statistical Computing; 2013.
- 679 38. Vonesch SC, Lamparter D, Mackay TF, Bergmann S, Hafen E. Genome-Wide Analysis Reveals  
680 Novel Regulators of Growth in *Drosophila melanogaster*. *PLoS Genet*. 2016;12(1):e1005616. doi:  
681 10.1371/journal.pgen.1005616. PubMed PMID: 26751788; PubMed Central PMCID:  
682 PMCPMC4709145.
- 683 39. Ward PS. The Phylogeny and Evolution of Ants. *Annu Rev Ecol Evol S*. 2014;45:23-43. doi:  
684 10.1146/annurev-ecolsys-120213-091824. PubMed PMID: WOS:000348461700002.
- 685 40. Weber AL, Khan GF, Magwire MM, Tabor CL, Mackay TF, Anholt RR. Genome-wide  
686 association analysis of oxidative stress resistance in *Drosophila melanogaster*. *Plos One*.  
687 2012;7(4):e34745. doi: 10.1371/journal.pone.0034745. PubMed PMID: 22496853; PubMed Central  
688 PMCID: PMCPMC3319608.
- 689 41. Weber JN, Peterson BK, Hoekstra HE. Discrete genetic modules are responsible for complex  
690 burrow evolution in *Peromyscus* mice. *Nature*. 2013;493(7432):402-5. doi: 10.1038/nature11816.  
691 PubMed PMID: 23325221.
- 692 42. Yang J, Lee SH, Goddard ME, Visscher PM. GCTA: a tool for genome-wide complex trait  
693 analysis. *Am J Hum Genet*. 2011;88(1):76-82. doi: 10.1016/j.ajhg.2010.11.011. PubMed PMID:  
694 21167468; PubMed Central PMCID: PMCPMC3014363.
